# Supplementary material for: An ultrasensitive detection of 17β-estradiol using a gold nanoparticle-based fluorescence immunoassay
Source: Royal Society of Chemistry journal article supplement (doi:10.1039/c4an01952k), 2015-01-01

## Electronic supplementary information (ESI)

### Ultrasensitive detection of 17 $\beta$ -estradiol using gold nanoparticle-based fluorescence immunoassay

Lingyun Du<sup>a</sup>, Wei Ji<sup>a</sup>, Yuanfu Zhang<sup>a</sup>, Chunyan Zhang<sup>a</sup>, Guofu Liu<sup>b</sup>, and Shuhao Wang<sup>\*a</sup>

<sup>a</sup> Shandong Provincial Key Laboratory of Chemical Energy Storage and Novel Cell Technology,  
School of Chemistry and Chemical Engineering, Liaocheng University, Liaocheng 252059, China. E-mail address: shuhaowang@sohu.com; Tel./Fax: +86 635 8239227.

<sup>b</sup> College of Life Science, Liaocheng University, Liaocheng 252059, China

Fig. S1 (a) The UV-vis spectra of unmodified gold nanoparticles. (b) The UV-vis spectra of DC-AuNPs.

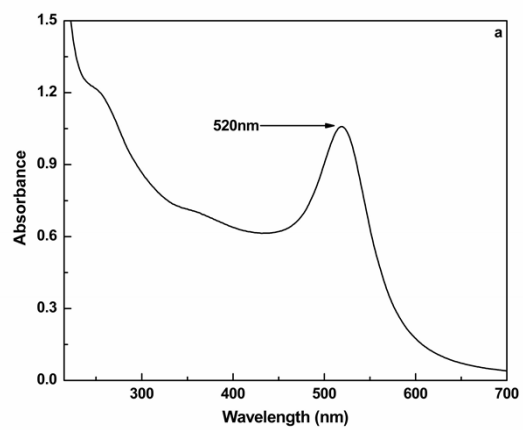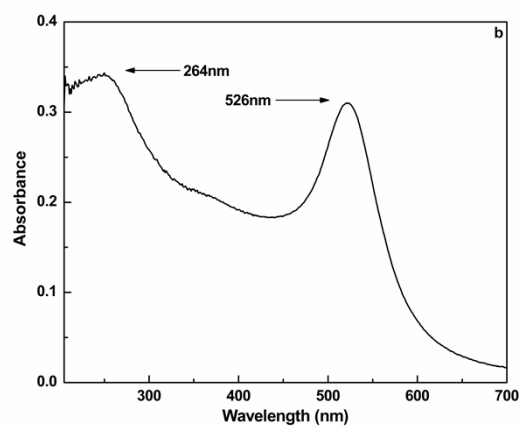

Fig. S2 (a) The curves of DC-AuNPs at different quantity of goat anti-rabbit antibody and ss-DNA. (b) The volume of ss-DNA ( $50 \mu\text{mol L}^{-1}$ ).

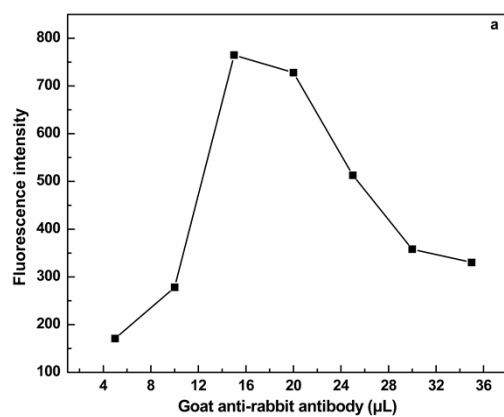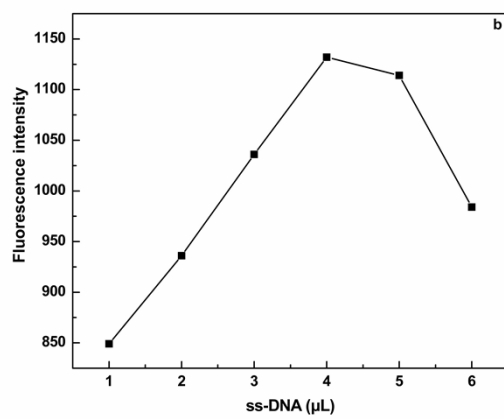

Supplement: c4an01952k1.pdf [file c4an01952k1.pdf]
